# Supplementary material for: Unveiling the Anti-Cholera and Active Diabetic Renoprotective Compounds of Maqian Essential Oil: A Computational and Molecular Dynamics Study
Source: MDPI journal article supplement (doi:10.3390/molecules28247954), 2023-12-05
Supplement: s1 [file s1]

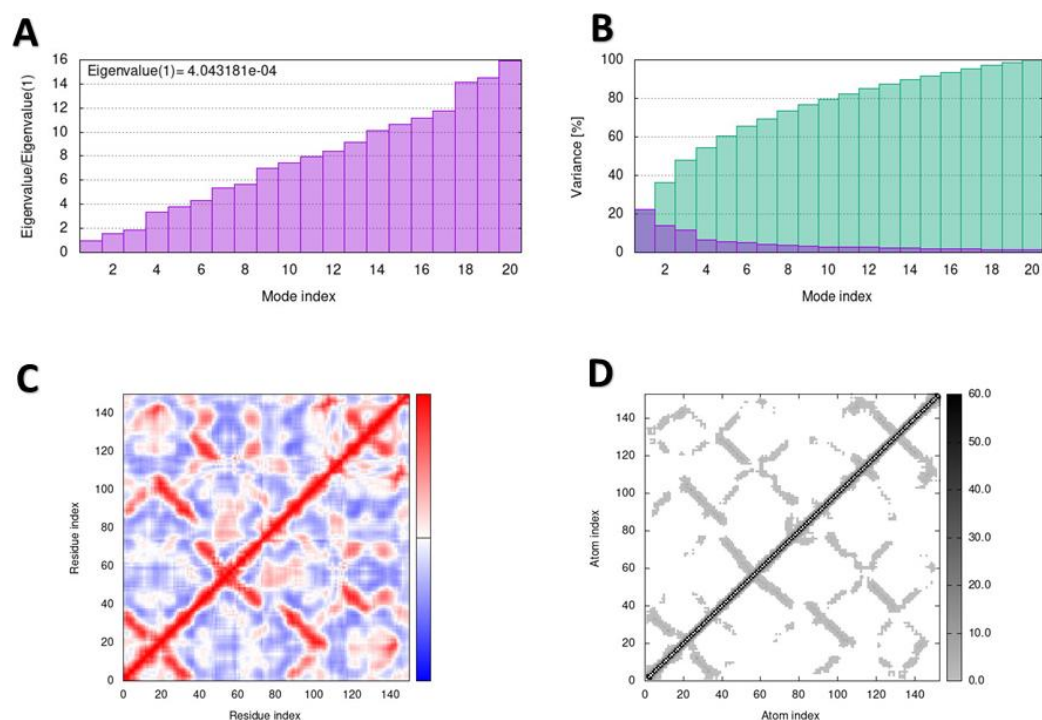

**Figure S1.** Molecular dynamics simulation of a predicted TXNIP with p-cymene. (A). Deformability, (B) Eigenvalues, (C) Variance (Blue: individual variances, green: cumulative variances), (D) Co-variance map (residues with correlated motions in red, uncorrelated motions in white, and anti-correlated motions in blue), (E) Elastic network analysis.

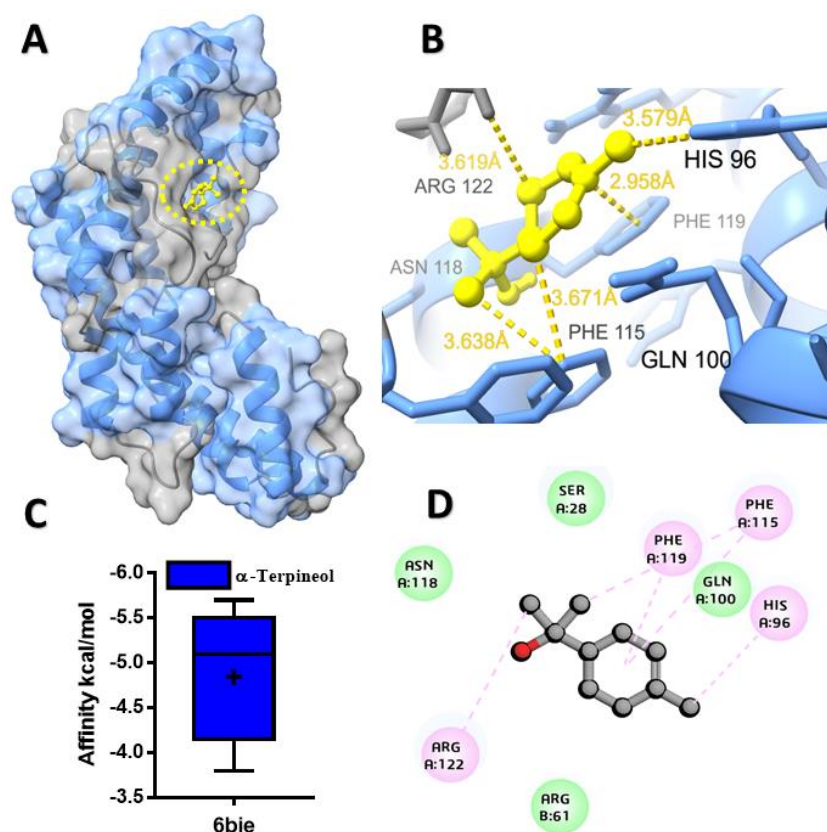

**Figure S2.** Predicted structure for protein-ligand docked complex. (A), Pose view of the interaction of  $\alpha$ -Terpineol to the DPP IV protein (B) 3D interaction of  $\alpha$ -Terpineol with DPP IV protein, (C) Box plot depicted binding affinity scores for predictions of DPP IV (6bie) protein with  $\alpha$ -Terpineol, (D) 2D interaction of  $\alpha$ -Terpineol with key residues.

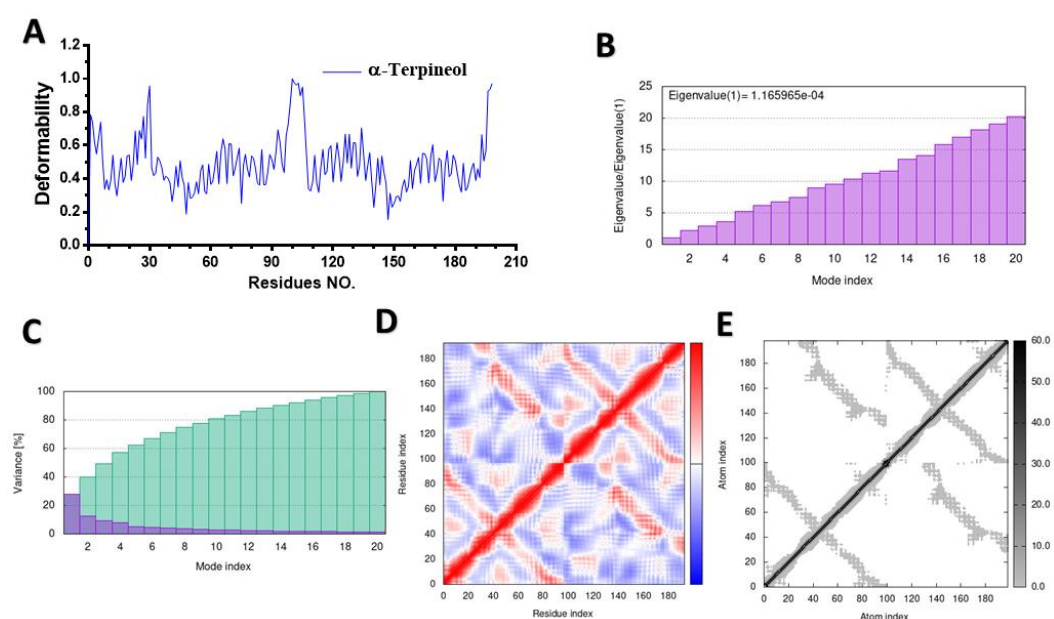

**Figure S3.** Molecular dynamics simulation of a predicted DPP IV (6bie) with  $\alpha$ -Terpineol. (A). Deformability, (B) Eigenvalues, (C) Variance (Blue: individual variances, green: cumulative variances), (D) Co-variance map (residues with correlated motions in red, uncorrelated motions in white, and anti-correlated motions in blue), (E) Elastic network analysis.

Table S1. RMSD\* values for the best docked mode of protein-ligand complexes.

| Compound name           | 4gfx         |              | 5cgj         |              | 5y7h         |              | 6bie         |              | 1xtc         |              |
|-------------------------|--------------|--------------|--------------|--------------|--------------|--------------|--------------|--------------|--------------|--------------|
|                         | l.b**        | u.b***       | l.b          | u.b          | l.b          | u.b          | l.b          | u.b          | l.b          | u.b          |
| $\alpha$ -Pinene        | 0.974        | 3.407        | 1.305        | 3.135        | 1.139        | 3.148        | 1.024        | 3.420        | 0.970        | 3.328        |
| $\beta$ -Pinene         | 11.49        | 13.078       | 10.851       | 12.615       | 1.151        | 2.054        | 5.822        | 7.991        | 1.069        | 3.366        |
| $\alpha$ -Phellandrene  | <b>0.883</b> | <b>4.315</b> | 10.414       | 13.099       | 0.991        | 4.280        | 1.231        | 2.182        | 1.839        | 4.306        |
| 3-Carene                | 1.288        | 3.311        | 0.807        | 3.863        | 1.309        | 2.795        | 5.944        | 8.315        | 0.814        | 3.864        |
| p-cymene                | 1.759        | 4.342        | 8.055        | 8.816        | <b>1.015</b> | <b>4.402</b> | 2.313        | 5.775        | 1.549        | 2.174        |
| D-Limonene              | 2.695        | 4.558        | 7.807        | 8.594        | 1.317        | 2.829        | 1.047        | 4.358        | 1.009        | 4.244        |
| $\beta$ -Phellandrene   | 0.911        | 4.243        | 13.264       | 14.803       | 1.214        | 4.461        | 1.318        | 2.369        | 1.451        | 2.239        |
| cis- $\beta$ -Ocimene   | 1.610        | 3.003        | 3.870        | 6.648        | 0.780        | 5.558        | 2.044        | 4.650        | 1.503        | 4.371        |
| trans- $\beta$ -Ocimene | 1.758        | 3.264        | 2.655        | 4.664        | 1.954        | 3.632        | 1.894        | 4.585        | 7.626        | 9.728        |
| $\alpha$ -Terpineol     | 3.602        | 4.729        | <b>2.471</b> | <b>4.671</b> | 1.459        | 1.792        | <b>2.046</b> | <b>4.612</b> | <b>1.743</b> | <b>2.522</b> |
| n-Decana                | 2.362        | 4.365        | 0.978        | 1.372        | 2.874        | 6.288        | 2.802        | 5.621        | 1.807        | 3.072        |
| Acetic acid octyl ester | 3.958        | 5.514        | 1.320        | 3.091        | 2.691        | 3.960        | 2.597        | 5.569        | 1.420        | 2.159        |

\*RMSD; root mean-square deviation for the average distance between the atoms, \*\*l.b; lower bound,

\*\*\*u.b; upper bound.

**Table S2.** Pharmacokinetics properties of MQEO compounds from SwissADME web server.

| <b>Compound name</b>    | <b>GI*<br/>absorption</b> | <b>BBB**<br/>permeant</b> | <b>Pgp***<br/>substrate</b> | <b>****CYP1A<br/>2 inhibitor</b> | <b>CYP2C19<br/>inhibitor</b> | <b>CYP2C9<br/>inhibitor</b> | <b>CYP2D6<br/>inhibitor</b> | <b>CYP3A4<br/>inhibitor</b> |
|-------------------------|---------------------------|---------------------------|-----------------------------|----------------------------------|------------------------------|-----------------------------|-----------------------------|-----------------------------|
| $\alpha$ -Pinene        | Low                       | Yes                       | No                          | No                               | No                           | Yes                         | No                          | No                          |
| $\beta$ -Pinene         | Low                       | Yes                       | No                          | No                               | No                           | Yes                         | No                          | No                          |
| $\alpha$ -Phellandrene  | Low                       | Yes                       | No                          | No                               | No                           | No                          | No                          | No                          |
| 3-Carene                | Low                       | Yes                       | No                          | No                               | No                           | Yes                         | No                          | No                          |
| p-cymene                | Low                       | Yes                       | No                          | No                               | No                           | No                          | Yes                         | No                          |
| D-Limonene              | Low                       | Yes                       | No                          | No                               | No                           | Yes                         | No                          | No                          |
| $\beta$ -Phellandrene   | Low                       | Yes                       | No                          | No                               | No                           | No                          | No                          | No                          |
| cis- $\beta$ -Ocimene   | Low                       | Yes                       | No                          | No                               | No                           | No                          | No                          | No                          |
| trans- $\beta$ -Ocimene | Low                       | Yes                       | No                          | No                               | No                           | No                          | No                          | No                          |
| $\alpha$ -Terpineol     | High                      | Yes                       | No                          | No                               | No                           | No                          | No                          | No                          |
| n-Decanal               | High                      | Yes                       | No                          | No                               | No                           | No                          | No                          | No                          |
| Acetic acid octyl ester | High                      | Yes                       | No                          | No                               | No                           | No                          | No                          | No                          |

\*GI: gastrointestinal, \*\*BBB: blood–brain barrier, \*\*\*Pgp: P-glycoprotein, \*\*\*\*CYP: Cytochrome P

**Table S3.** Organ toxicity prediction of MQEO compound from ProTox-II web server.

| Compound name           | Hepatotoxicity |        | Carcinogenicity |             | Immunotoxicity |      | Mutagenicity |      | Cytotoxicity |      |
|-------------------------|----------------|--------|-----------------|-------------|----------------|------|--------------|------|--------------|------|
|                         | Pred*          | Prob** | Pred            | Prob        | Pred           | Prob | Pred         | Prob | Pred         | Prob |
| $\alpha$ -Pinene        | Inactive       | 0.8    | Inactive        | 0.66        | Inactive       | 0.97 | Inactive     | 0.95 | Inactive     | 0.71 |
| $\beta$ -Pinene         | Inactive       | 0.80   | Inactive        | 0.66        | Inactive       | 0.97 | Inactive     | 0.95 | Inactive     | 0.71 |
| $\alpha$ -Phellandrene  | Inactive       | 0.83   | Inactive        | 0.52        | Inactive       | 0.88 | Inactive     | 0.92 | Inactive     | 0.80 |
| 3-Carene                | Inactive       | 0.84   | Inactive        | 0.62        | Inactive       | 0.95 | Inactive     | 0.66 | Inactive     | 0.71 |
| p-cymene                | Inactive       | 0.87   | <b>Active</b>   | <b>0.67</b> | Inactive       | 0.99 | Inactive     | 0.98 | Inactive     | 0.89 |
| D-Limonene              | Inactive       | 0.76   | Inactive        | 0.65        | Inactive       | 0.95 | Inactive     | 0.97 | Inactive     | 0.82 |
| $\beta$ -Phellandrene   | Inactive       | 0.76   | Inactive        | 0.65        | Inactive       | 0.55 | Inactive     | 0.93 | Inactive     | 0.81 |
| cis- $\beta$ -Ocimene   | Inactive       | 0.83   | Inactive        | 0.51        | Inactive       | 0.99 | Inactive     | 0.90 | Inactive     | 0.75 |
| trans- $\beta$ -Ocimene | Inactive       | 0.83   | Inactive        | 0.51        | Inactive       | 0.99 | Inactive     | 0.90 | Inactive     | 0.75 |
| $\alpha$ -Terpineol     | Inactive       | 0.72   | Inactive        | 0.76        | Inactive       | 0.99 | Inactive     | 0.90 | Inactive     | 0.64 |
| n-Decanal               | Inactive       | 0.71   | Inactive        | 0.59        | Inactive       | 0.95 | Inactive     | 0.96 | Inactive     | 0.73 |
| Acetic acid octyl ester | Inactive       | 0.76   | <b>Active</b>   | <b>0.56</b> | Inactive       | 0.95 | Inactive     | 0.99 | Inactive     | 0.78 |

\*Pred: Prediction, \*\*Prop: Probability.

**Table S4.** Nuclear receptor and stress response signaling pathways for MQEO compounds prediction from ProTox-II web server.

| Compound name           | AhR*     |      | AR**     |      | AR-LBD*** |      | Aromatase |      | ER****   |      | ER-LBD***** |      |
|-------------------------|----------|------|----------|------|-----------|------|-----------|------|----------|------|-------------|------|
|                         | Pred     | Prob | Pred     | Prob | Pred      | Prob | Pred      | Prob | Pred     | Prob | Pred        | Prob |
| $\alpha$ -Pinene        | Inactive | 0.99 | Inactive | 0.99 | Inactive  | 0.99 | Inactive  | 0.94 | Inactive | 0.97 | Inactive    | 0.99 |
| $\beta$ -Pinene         | Inactive | 0.99 | Inactive | 0.99 | Inactive  | 0.99 | Inactive  | 0.94 | Inactive | 0.97 | Inactive    | 0.99 |
| $\alpha$ -Phellandrene  | Inactive | 1.0  | Inactive | 1.0  | Inactive  | 0.99 | Inactive  | 1.0  | Inactive | 0.97 | Inactive    | 0.99 |
| 3-Carene                | Inactive | 0.99 | Inactive | 1.0  | Inactive  | 1.0  | Inactive  | 0.95 | Inactive | 0.95 | Inactive    | 0.99 |
| p-cymene                | Inactive | 1.00 | Inactive | 1.00 | Inactive  | 1.00 | Inactive  | 1.00 | Inactive | 1.00 | Inactive    | 1.00 |
| D-Limonene              | Inactive | 1.00 | Inactive | 0.99 | Inactive  | 1.00 | Inactive  | 0.99 | Inactive | 0.84 | Inactive    | 1.00 |
| $\beta$ -Phellandrene   | Inactive | 0.99 | Inactive | 1.00 | Inactive  | 0.99 | Inactive  | 1.00 | Inactive | 0.94 | Inactive    | 0.99 |
| cis- $\beta$ -Ocimene   | Inactive | 0.99 | Inactive | 1.00 | Inactive  | 0.99 | Inactive  | 1.00 | Inactive | 0.97 | Inactive    | 0.99 |
| trans- $\beta$ -Ocimene | Inactive | 0.99 | Inactive | 1.00 | Inactive  | 0.99 | Inactive  | 1.00 | Inactive | 0.97 | Inactive    | 0.99 |
| $\alpha$ -Terpineol     | Inactive | 0.99 | Inactive | 0.99 | Inactive  | 1.00 | Inactive  | 0.97 | Inactive | 0.93 | Inactive    | 0.98 |
| n-Decanal               | Inactive | 1.00 | Inactive | 1.00 | Inactive  | 1.00 | Inactive  | 1.00 | Active   | 0.87 | Inactive    | 1.00 |
| Acetic acid octyl ester | Inactive | 1.00 | Inactive | 1.00 | Inactive  | 1.00 | Inactive  | 1.00 | Inactive | 0.58 | Inactive    | 1.00 |

\*AhR; Aryl hydrocarbon Receptor, \*\*AR; Androgen Receptor, \*\*\*AR-LBD; Androgen Receptor Ligand Binding Domain, \*\*\*\*ER; Estrogen Receptor Alpha, \*\*\*\*\*ER-LBD; Estrogen Receptor Ligand Binding Domain.

**Table S4.** Cont.

| Compound name           | PPAR-Gamma* |      | nrf2/ARE** |      | HSE***   |      | MMP****  |      | p53***** |      | ATAD5***** |      |
|-------------------------|-------------|------|------------|------|----------|------|----------|------|----------|------|------------|------|
|                         | Pred        | Prob | Pred       | Prob | Pred     | Prob | Pred     | Prob | Pred     | Prob | Pred       | Prob |
| $\alpha$ -Pinene        | Inactive    | 0.99 | Inactive   | 0.96 | Inactive | 0.96 | Inactive | 0.97 | Inactive | 1.0  | Inactive   | 1.0  |
| $\beta$ -Pinene         | Inactive    | 0.99 | Inactive   | 0.96 | Inactive | 0.96 | Inactive | 0.97 | Inactive | 1.0  | Inactive   | 1.0  |
| $\alpha$ -Phellandrene  | Inactive    | 1.0  | Inactive   | 0.99 | Inactive | 0.99 | Inactive | 0.97 | Inactive | 1.0  | Inactive   | 1.0  |
| 3-Carene                | Inactive    | 0.99 | Inactive   | 0.95 | Inactive | 0.95 | Inactive | 0.94 | Inactive | 0.99 | Inactive   | 0.99 |
| p-cymene                | Inactive    | 1.00 | Inactive   | 1.00 | Inactive | 1.00 | Inactive | 1.00 | Inactive | 1.00 | Inactive   | 1.00 |
| D-Limonene              | Inactive    | 1.00 | Inactive   | 0.98 | Inactive | 0.98 | Inactive | 1.00 | Inactive | 1.00 | Inactive   | 1.00 |
| $\beta$ -Phellandrene   | Inactive    | 1.00 | Inactive   | 0.70 | Inactive | 0.70 | Inactive | 0.96 | Inactive | 1.00 | Inactive   | 1.00 |
| cis- $\beta$ -Ocimene   | Inactive    | 1.00 | Inactive   | 0.95 | Inactive | 0.95 | Inactive | 0.99 | Inactive | 1.00 | Inactive   | 1.00 |
| trans- $\beta$ -Ocimene | Inactive    | 1.00 | Inactive   | 0.95 | Inactive | 0.95 | Inactive | 0.99 | Inactive | 1.00 | Inactive   | 1.00 |
| $\alpha$ -Terpineol     | Inactive    | 0.99 | Inactive   | 0.97 | Inactive | 0.97 | Inactive | 0.92 | Inactive | 1.00 | Inactive   | 1.00 |
| n-Decanal               | Inactive    | 0.99 | Inactive   | 1.00 | Inactive | 1.00 | Inactive | 1.00 | Inactive | 1.00 | Inactive   | 1.00 |
| Acetic acid octyl ester | Inactive    | 1.00 | Inactive   | 1.00 | Inactive | 1.00 | Inactive | 1.00 | Inactive | 1.00 | Inactive   | 1.00 |

\*PPAR-Gamma; eroxisome Proliferator Activated Receptor Gamma, \*\*nrf2/ARE: Nuclear factor (erythroid-derived 2)-like 2/antioxidant responsive element, \*\*\*HSE; Heat shock factor response element, \*\*\*\*MMP; Mitochondrial Membrane Potential, \*\*\*\*\*p53; Phosphoprotein (Tumor Suppressor), \*\*\*\*\*ATAD5; ATPase family AAA domain-containing protein 5.
